# Supplementary figures and images for: Scc2/Nipbl hops between chromosomal cohesin rings after loading
Source: eLife journal article supplement (doi:10.7554/elife.30000), 2017-09-15

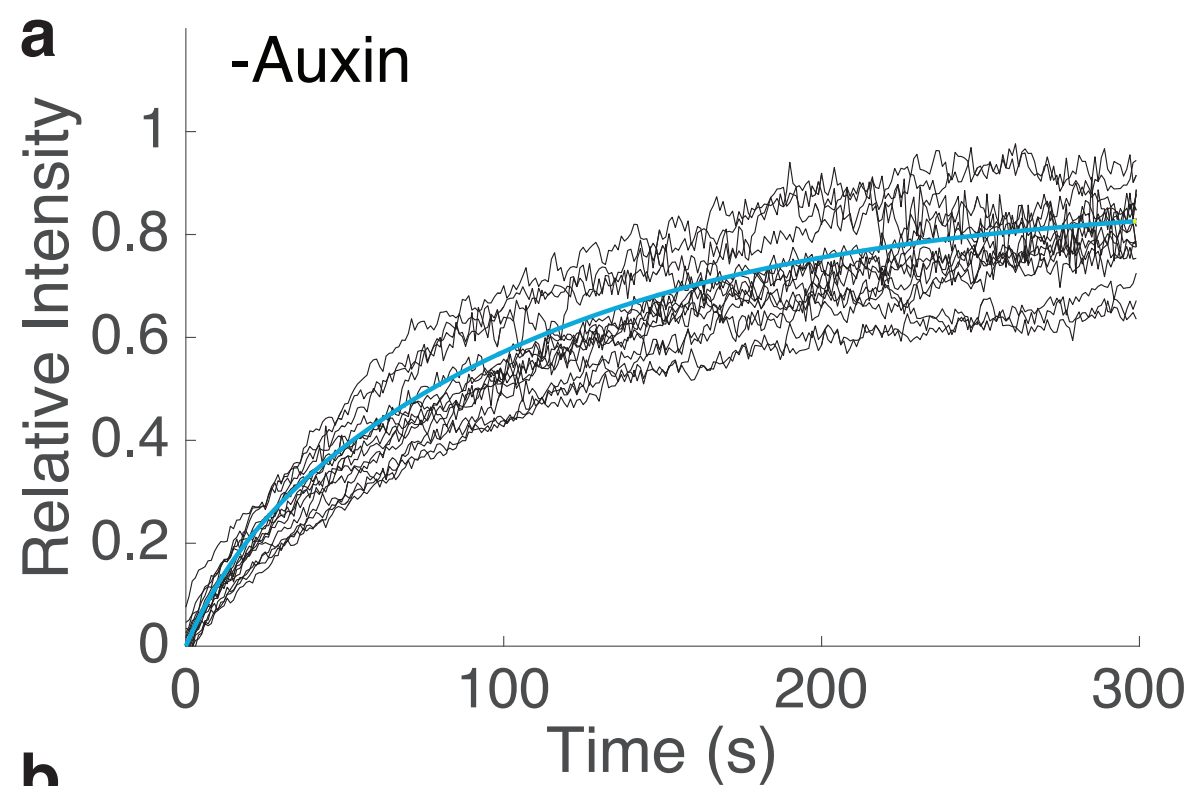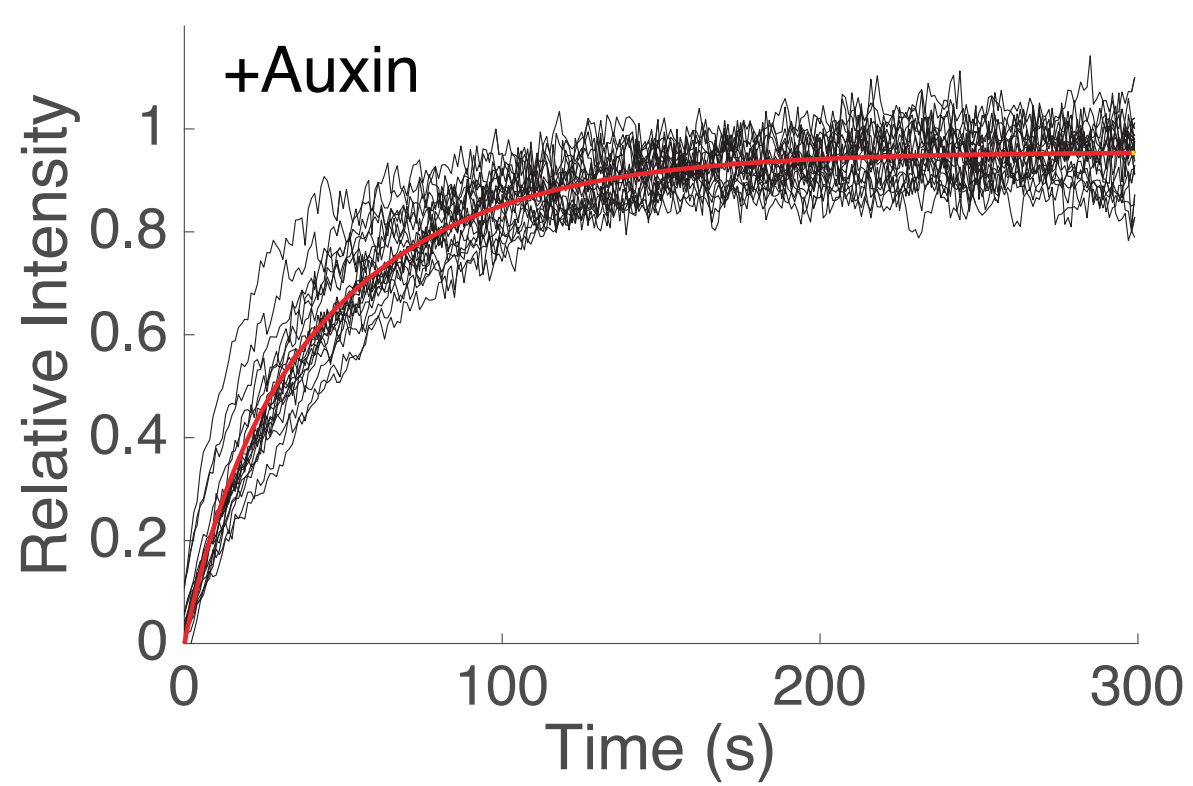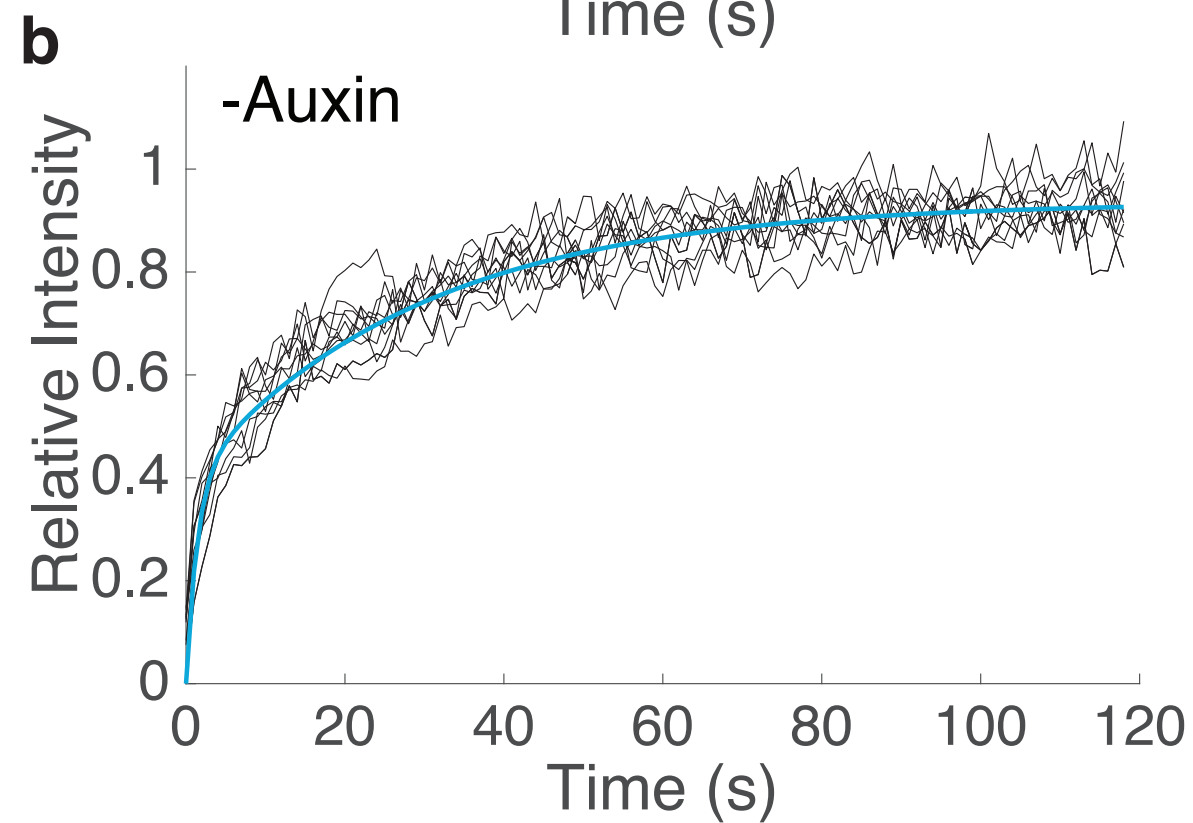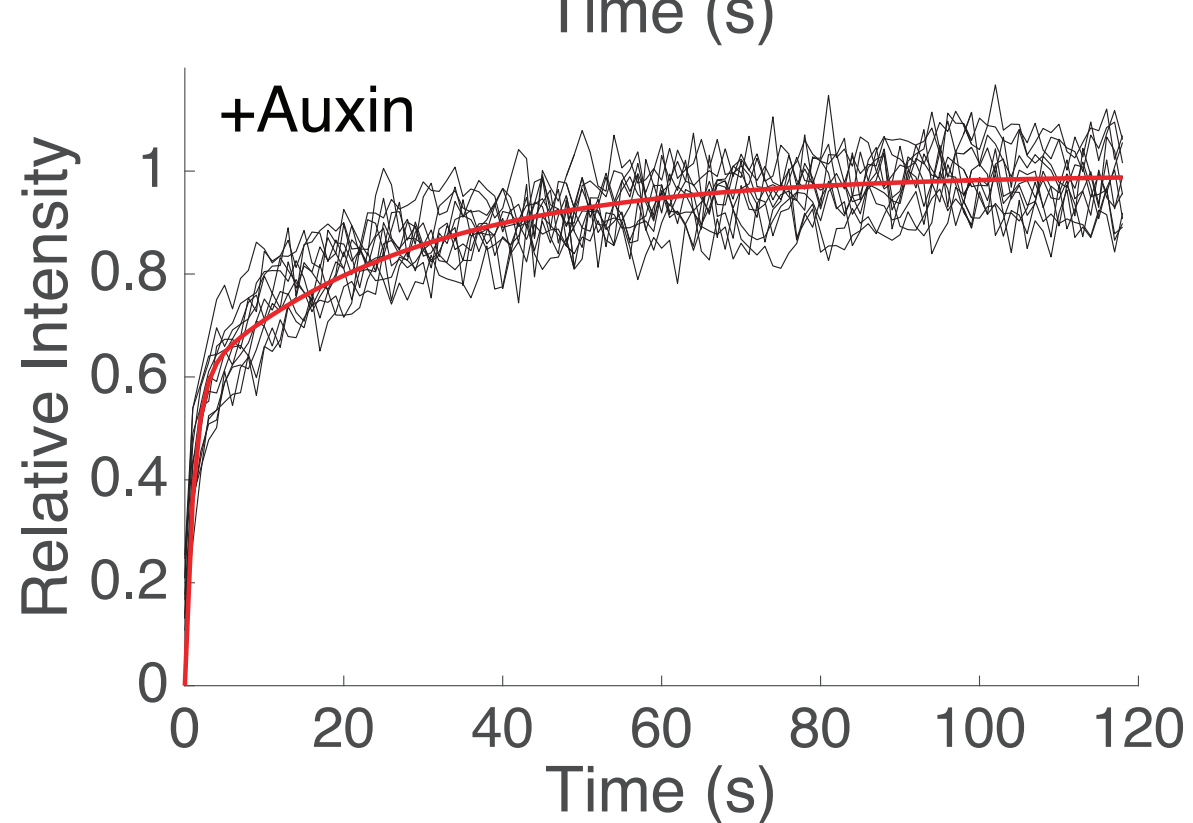

Supplement: supp [file elife-30000-supp-v1.zip]

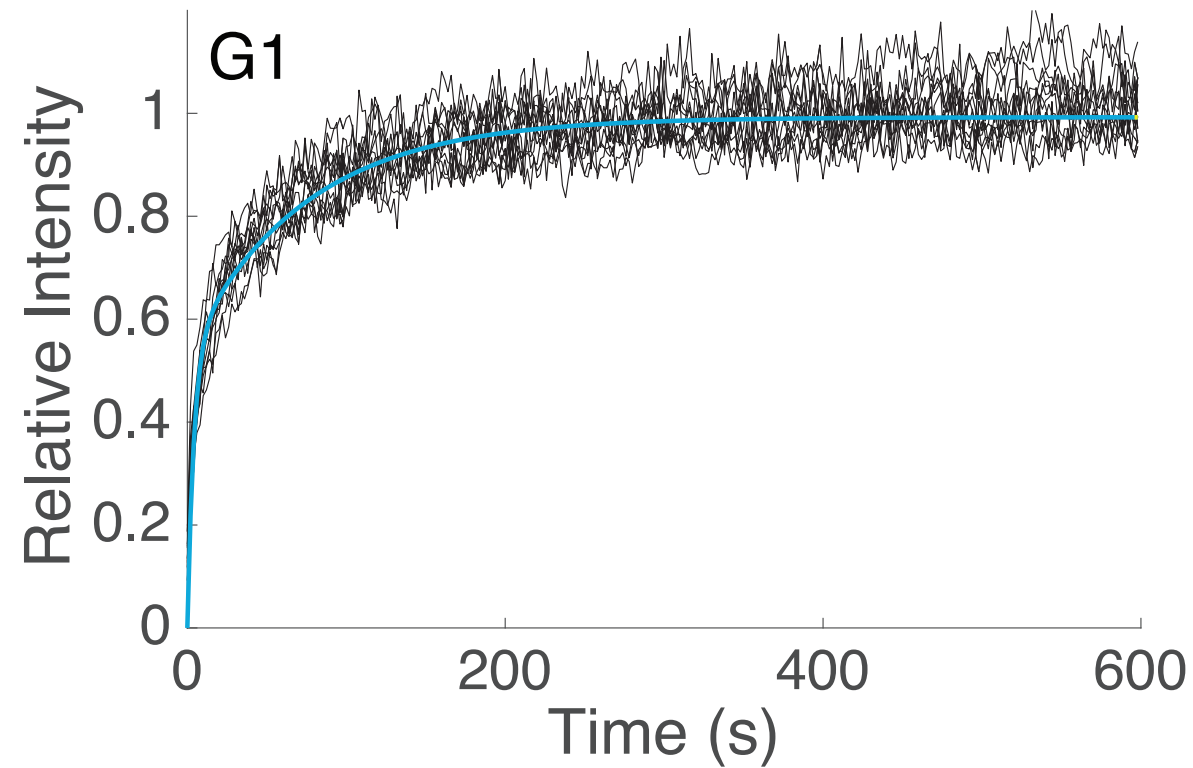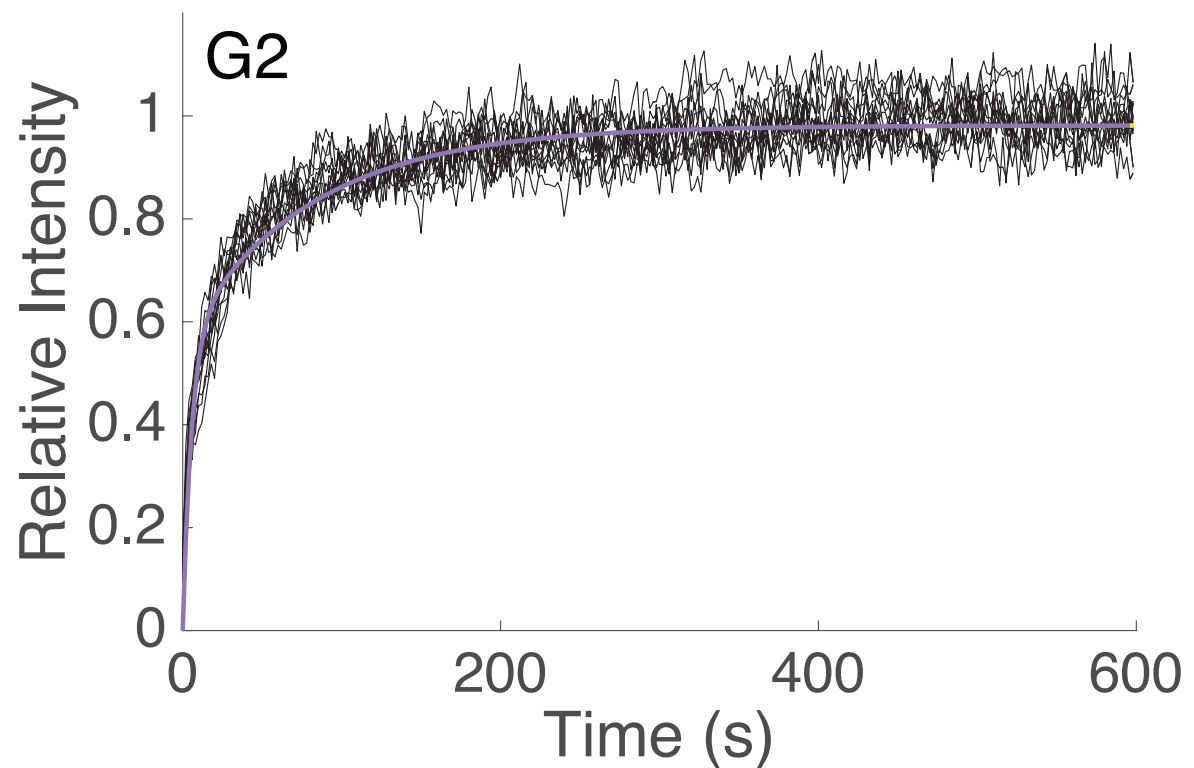

Supplement: supp [file elife-30000-supp-v1.zip]

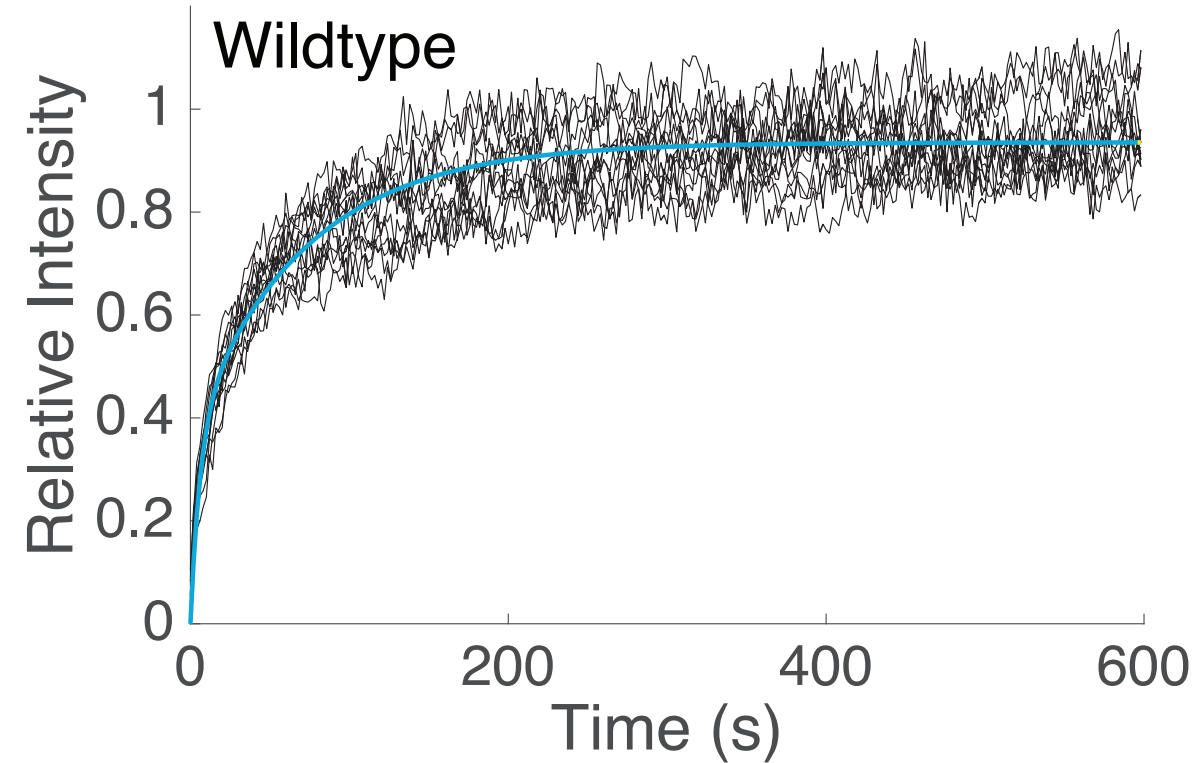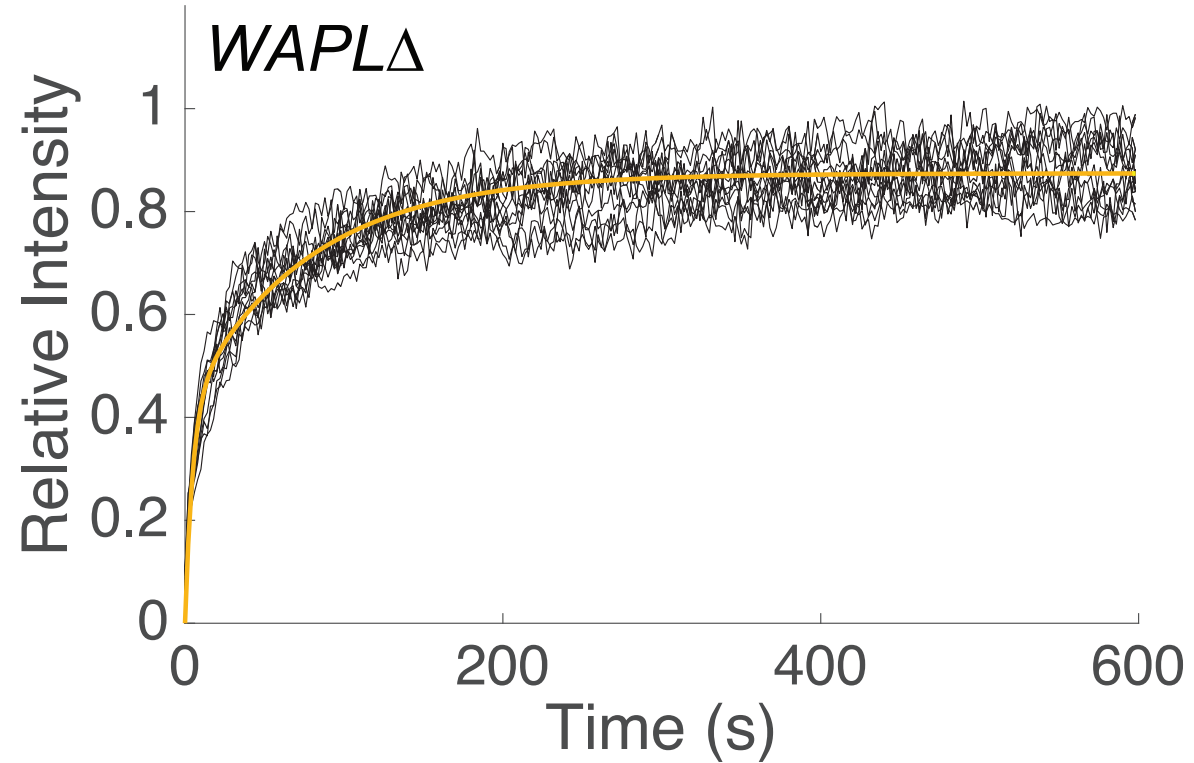

Supplement: supp [file elife-30000-supp-v1.zip]

**a**

Single Exponential Fit

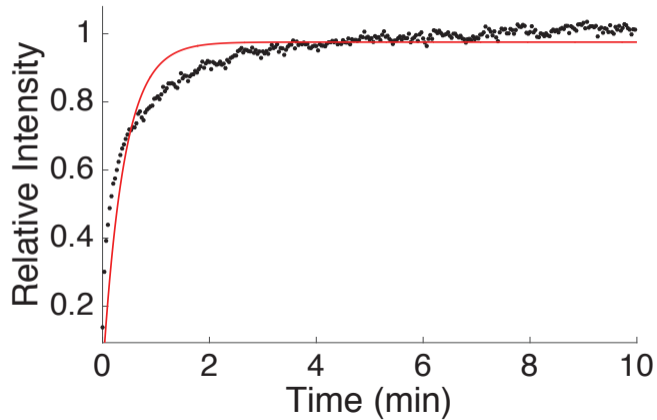**b**

Double Exponential Fit

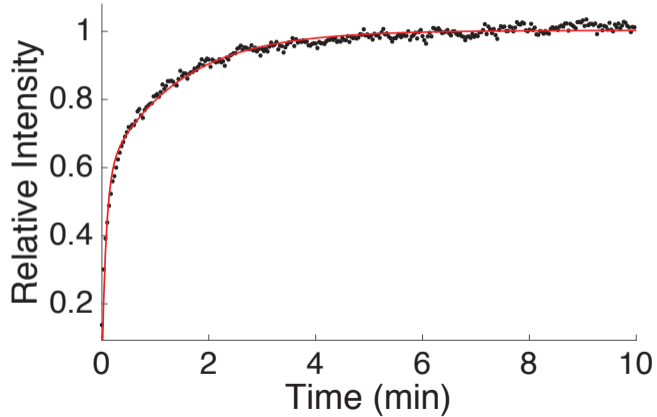

Supplement: supp [file elife-30000-supp-v1.zip]

Prebleach

Postbleach

23s

Wapl $\Delta$  GFP-Scc2

53s

160s

300s

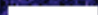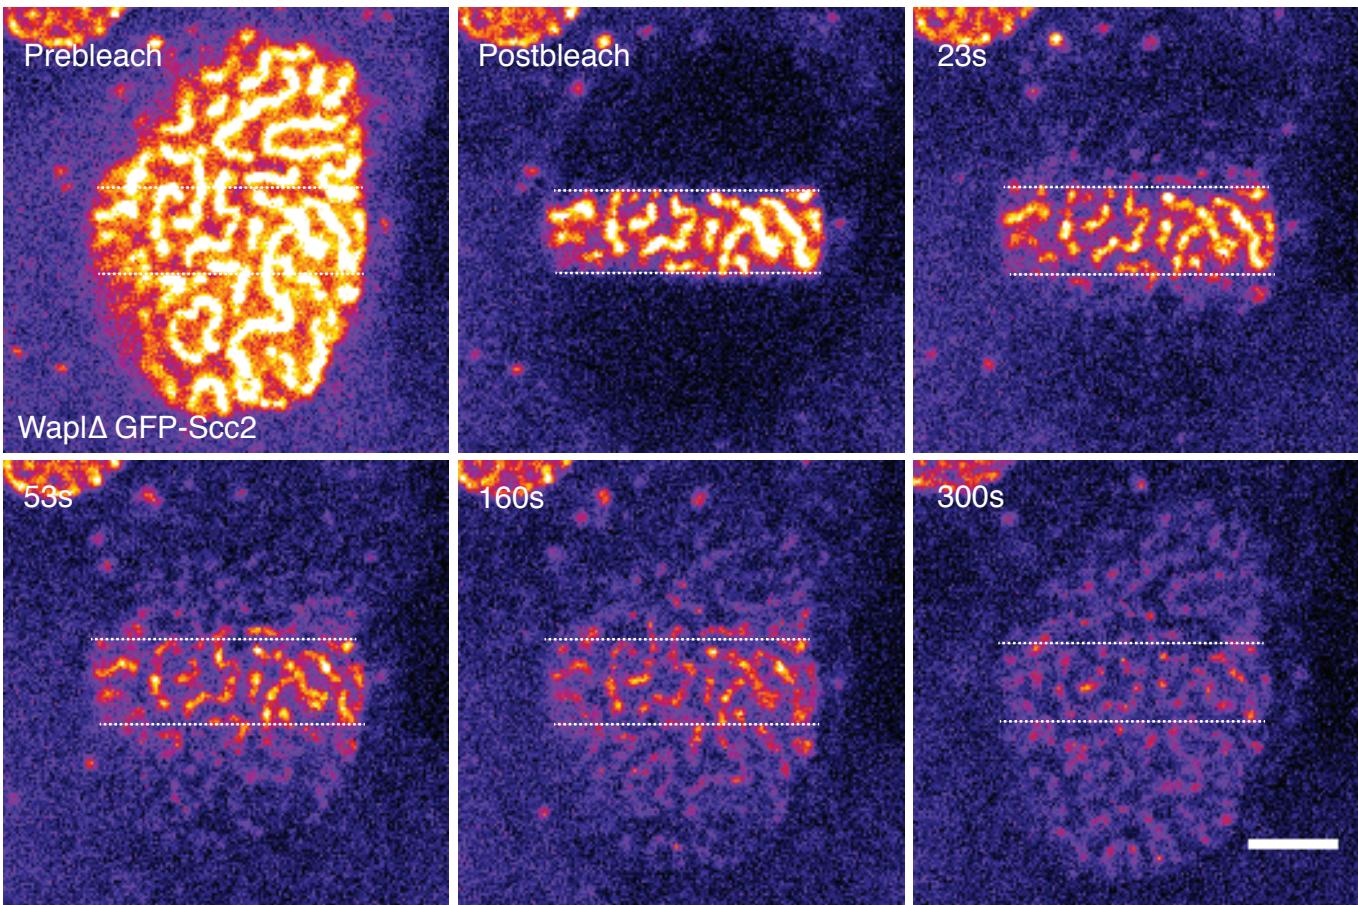

Supplement: supp [file elife-30000-supp-v1.zip]
